1 **Salvaging complete and high-quality genomes of novel microbial species from a**  
2 **meromictic lake using a workflow combining long- and short-read sequencing**  
3 **platforms**

4 Yu-Hsiang Chen<sup>1,2,3</sup>, Pei-Wen Chiang<sup>3</sup>, Denis Yu Rogozin<sup>4,5</sup>, Andrey G.

5 Degermendzhy<sup>4</sup>, Hsiu-Hui Chiu<sup>3</sup>, Sen-Lin Tang<sup>2,3#</sup>

6

7 <sup>1</sup>Bioinformatics Program, Taiwan International Graduate Program, National Taiwan  
8 University, Taipei, Taiwan

9 <sup>2</sup>Bioinformatics Program, Institute of Information Science, Taiwan International  
10 Graduate Program, Academia Sinica, Taipei, Taiwan

11 <sup>3</sup>Biodiversity Research Center, Academia Sinica, Taipei, Taiwan

12 <sup>4</sup>Institute of Biophysics, Siberian Division of Russian Academy of Sciences,  
13 Krasnoyarsk, Russia

14 <sup>5</sup>Siberian Federal University, Krasnoyarsk, Russia

15

16 # Corresponding author

17 Biodiversity Research Center, Academia Sinica

18 E-mail: sltang@gate.sinica.edu.tw

19 Tel: +886-2-27893863

20 Fax: +886-2-27890844

## 21 **Abstract**

### 22 **Background**

23 Most of Earth's bacteria have yet to be cultivated. The metabolic and functional  
24 potentials of these uncultivated microorganisms thus remain mysterious, and the  
25 metagenome-assembled genome (MAG) approach is the most robust method for  
26 uncovering these potentials. However, MAGs discovered by conventional  
27 metagenomic assembly and binning methods are usually highly fragmented genomes  
28 with heterogeneous sequence contamination, and this affects the accuracy and  
29 sensitivity of genomic analyses. Though the maturation of long-read sequencing  
30 technologies provides a good opportunity to fix the problem of highly fragmented  
31 MAGs as mentioned above, the method's error-prone nature causes severe problems  
32 of long-read-alone metagenomics. Hence, methods are urgently needed to retrieve  
33 MAGs by a combination of both long- and short-read technologies to advance  
34 genome-centric metagenomics.

### 35 **Results**

36 In this study, we combined Illumina and Nanopore data to develop a new workflow to  
37 reconstruct 233 MAGs—six novel bacterial orders, 20 families, 66 genera, and 154  
38 species—from Lake Shunet, a secluded meromictic lake in Siberia. Those new MAGs

39 were underrepresented or undetectable in other MAGs studies using metagenomes  
40 from human or other common organisms or habitats. Using this newly developed  
41 workflow and strategy, the average N50 of reconstructed MAGs greatly increased  
42 10–40-fold compared to when the conventional Illumina assembly and binning  
43 method were used. More importantly, six complete MAGs were recovered from our  
44 datasets, five of which belong to novel species. We used these as examples to  
45 demonstrate many novel and intriguing genomic characteristics discovered in these  
46 newly complete genomes and proved the importance of high-quality complete MAGs  
47 in microbial genomics and metagenomics studies.

## 48 **Conclusions**

49 The results show that it is feasible to apply our workflow with a few additional long  
50 reads to recover numerous complete and high-quality MAGs from short-read  
51 metagenomes of high microbial diversity environment samples. The unique features  
52 we identified from five complete genomes highlight the robustness of this method in  
53 genome-centric metagenomic research. The recovery of 154 novel species MAGs  
54 from a rarely explored lake greatly expands the current bacterial genome  
55 encyclopedia and broadens our knowledge by adding new genomic characteristics of  
56 bacteria. It demonstrates a strong need to recover MAGs from diverse unexplored  
57 habitats in the search for microbial dark matter.

58 **Keywords:** Metagenome-assembled genome, metagenomics, saline lake,  
59 microbiology, and Nanopore sequencing.

60

## 61 **Background**

62 Rapid developments in bioinformatics and sequencing methods enable us to  
63 reconstruct genomes directly from environmental samples using a culture-independent  
64 whole-genome-shotgun metagenomic approach. These genomes, also called  
65 metagenome-assembled genomes (MAGs), have become a crucial information source  
66 to explore metabolic and functional potentials of uncultivated microorganisms [1-4].  
67 Mining MAGs quickly expands our knowledge of microbial genome, diversity,  
68 phylogeny, evolution, and taxonomy [1-4]. For example, 18,365 MAGs were  
69 identified out of a total of 410,784 microorganisms in the Genomes OnLine Database  
70 (GOLD) [5]. A total of 52,515 MAGs were assembled from diverse habitats, and the  
71 MAG collection contains 12,556 potentially novel species and expands the known  
72 phylogenetic diversity in bacterial and archaeal domains by 44% [3].

73 Although genome-resolved metagenomics has revolutionized research in  
74 microbiology, significant challenges need to be overcome to make MAGs more  
75 accurate, reliable, and informative [1]. First, most MAGs are derived from the  
76 metagenomic assembly of short reads [1, 6], and these short-read-derived MAGs

77 usually comprise numerous short contigs rather than complete or nearly-complete  
78 genomic sequences, and thus important information on genomic characters is missed,  
79 such as operons, gene order, gene synteny, and promoter/regulatory regions. As of  
80 March 2021, only 177 out of 84,768 MAGs released in NCBI were complete. Second,  
81 fragmented MAGs usually miss some gene sequences and comprise unknown  
82 contaminant sequences, mistakenly assembled into the contigs [1]. Hence, low  
83 contiguity, high fragmentation, and unwanted contamination in short-read MAGs  
84 greatly affect further analyses in a variety of microbial genome-related studies.

85       The emergence of long-read sequencing platforms (also called third-generation  
86 sequencing platforms) such as Nanopore and PacBio provides an opportunity to  
87 improve the contiguity of MAGs and even reconstruct complete MAGs from  
88 extremely complex microbial communities [7, 8]. Recently, researchers started to  
89 develop new assemblers to reconstruct microbial genomes with high accuracy and  
90 long contiguous fragments from long-read metagenomic datasets. In 2019, Nagarajan  
91 *et al.* developed a hybrid assembler called OPERA-MS [9]. The assembler yielded  
92 MAGs with 200 times higher contiguity than short-read assemblers used on human  
93 gut microbiomes. In October 2020, Pevzner *et al.* developed metaFlye, a long-read  
94 metagenome assembler that can produce highly accurate assemblies (approximately  
95 99% assembly accuracy) [10, 11]. The success of these newly developed assemblers

96 becomes an important stepping-stone for reconstruction of complete MAGs with high  
97 accuracy. However, there is still much room to improve the procedures around data  
98 processing and assembling MAGs with long reads. The current study presents a new  
99 workflow for this purpose.

100 Our workflow combines Illumina sequencing reads and Nanopore long  
101 sequencing reads to recover many novel high-quality and high-contiguity prokaryotic  
102 MAGs from Lake Shunet, southern Siberia, one of only four meromictic lakes in all  
103 of Siberia. The lake contains stratified water layers, including a mixolimnion layer at  
104 3.0 m, chemocline at 5.0 m, and monimolimnion at 5.5 m. From our previous 16  
105 rRNA amplicon survey, we know that the lake comprises at least hundreds of  
106 unknown bacteria and archaea [12], highlighting the importance of mining microbial  
107 MAGs from this rarely explored lake. However, though we attempted to recover  
108 MAGs from these layers using deep Illumina sequencing with approximately 150 Gb,  
109 only one high-quality but still fragmented MAG was obtained [12]. Hence, in this  
110 study, we developed a new workflow combining Illumina and Nanopore sequencing  
111 reads by integrating several cutting-edge bioinformatics tools to recover and  
112 reconstruct MAGs with high contiguity and accuracy. We demonstrate that our newly  
113 built workflow can be used to reconstruct hundreds of complete high-quality MAGs  
114 from environmental samples in a high-complexity microbial community.

## 115 **Results and Discussions**

### 116 **Reconstruction of metagenome-assembled genomes with high contiguity from** 117 **Lake Shunet by combining Nanopore and Illumina sequences**

118 To recover novel metagenome-assembled genomes (MAGs) with high contiguity  
119 without compromising accuracy, 3.0-, 5.0-, and 5.5-m deep Lake Shunet samples  
120 were sequenced by Nanopore machines individually, and the resulting long reads  
121 (LRs) were analyzed together with short reads (SRs) using a workflow we developed  
122 for this study (Fig. 1a). Originally, we only used metaFlye, a state-of-art long-read  
123 metagenome assembler that can provide 99% accuracy [10, 11], to assemble the LRs.  
124 However, recent studies found that assemblies from long reads contain numerous  
125 in-del errors, leading to erroneous predictions of open reading frames and biosynthetic  
126 gene clusters [1, 10]. Incorrectly predicting open reading frames also affects the  
127 estimation of genome completeness by single-copy marker gene method, such as  
128 checkM [13]. Hence, we used SRs from Illumina sequencing to correct the contigs  
129 generated by LRs.

130 To recover more MAGs and improve contiguity, the assemblies from SRs and  
131 LRs were combined before binning. The contiguity of MAGs generated by combining  
132 two sequencing reads was dramatically higher than that from the Illumina assembly  
133 alone. The average N50 of MAGs from SRs only were 12.4 kb, 6.0 kb, and 7.2 kb in

134 the 3.0, 5.0, and 5.5-m dataset, respectively. Average N50 increased to 476.5 kb, 269.5  
135 kb, and 91.2 kb (Fig. 1b), respectively, when assembling with a combination of the  
136 two sequencing methods. A previous study showed that the qualities of MAGs can be  
137 improved by reassembly [14], so the step was incorporated into our workflow. When  
138 the MAGs were reassembled and selected, the average N50 increased from 476.5 kb  
139 to 530.0 kb in the 3.0 m dataset and 91.2 kb to 107.3 kb in the 5.5 m datasets (Fig.  
140 1b).

141 The correlations between read coverages and contiguity were determined (Fig.  
142 1c, d). The results revealed that the N50 values were more correlated with the  
143 Nanopore read coverage (Spearman's  $r = 0.7$ ) than the Illumina coverage (Spearman's  
144  $r = 0.33$ ). This is consistent with the previous observation that contiguity plateaued  
145 when the coverage of SRs reached a certain point because the assembly of SRs cannot  
146 solve repetitive sequences [9]. Nevertheless, LRs can address the issue by spanning  
147 repetitive regions. We also found that using SR assembly only, we cannot obtain  
148 MAGs with N50 >100kbp. By comparison, using our workflow, we can obtain 73  
149 MAGs with N50 > 100kbp. The mean SR coverage of these MAGs was 187 times,  
150 and mean LR coverage of them was only 67. Additionally, our data size of LRs is  
151 about 1/3 that of SRs. Taken together, it represents that the contiguity of MAGs can  
152 be greatly improved with one-third LRs. The results highlighted that 1) combining



153 two sequencing methods yield significant improvements in the qualities of MAGs that  
154 are recovered from high-complexity metagenomic datasets, and 2) With only extra  
155 one-third LR, we could retrieve genome information, such gene order, from previous  
156 SR-derived MAG collections.

157 Using our workflow, a total of 233 MAGs with completeness > 50% and  
158 contamination < 10% were reconstructed. For Genome Taxonomy Database (GTDB)  
159 species representatives, the genome quality index, defined as  
160  $\text{completeness} - 5 \times \text{contamination}$ , should be larger than 50. To meet the GTDB  
161 standard, the MAGs were filtered by this criterion, and the MAGs with low SR  
162 coverages (<80%) were discarded, resulting in 187 MAGs (Dataset S1). All the  
163 MAGs satisfied or surpassed the MIMAG standard for a medium-quality draft [15].  
164 The median completeness of MAGs was 81%, and the median contamination was  
165 1.1% (Fig. 1e). Moreover, 45.3% of the MAGs contained 16S rRNA gene sequences,  
166 and 34.5% of MAGs had 23S, 16S, and 5S rRNA gene sequences (Fig. 1f). The  
167 median GC ratio of MAGs from 3.0, 5.0, and 5.5 m were 52.75, 44.1, and 46.4%,  
168 respectively (Fig. 1g). We also used OPERA-MS to retrieve MAGs from SRs and LR.  
169 However, only 26 medium-quality or high-quality MAGs were recovered, indicating  
170 that the method is suboptimal in our case.

171

## 172 **Phylogenetic diversity and novelty of MAGs**

173 To explore the diversity of MAGs, we clustered and de-duplicated the genomes  
174 based on a 95% ANI cutoff for bacterial species demarcation [16], since identical  
175 microbial species may be detected and assembled from the three different layers. The  
176 procedure led to 165 species-level non-redundant MAGs (Dataset S1). The majority  
177 (93%) of the species-level MAGs could not be assigned to any known species after  
178 taxonomy annotation by the GTDB-Tk, revealing that a great deal of novel MAGs at  
179 the species and higher taxonomic ranks were detected (Dataset S2). The novel MAGs  
180 comprised six unknown bacterial orders, 20 families, and 66 genera (Fig. 2a).

181 To examine the phylogenetic diversity in the novel MAGs, a phylogenomic tree  
182 was reconstructed using all these bacterial MAGs and representative bacterial  
183 genomes in GTDB (Fig. 2b). The result demonstrated that the MAGs widely span the  
184 bacterial phylogeny. The MAGs were distributed across 24 phyla, including unusual  
185 and poorly-characterized phyla, such as *Armatimonadota*, *Margulisbacteria*,  
186 *Bipolaricaulota*, *Cloacimonadota*, and *Caldatribacteriota*. The phylum frequencies  
187 differed between the genome collections of the standard database and the Shunet  
188 datasets (Fig. 2c). The GTDB mainly comprised *Proteobacteria*. In contrast, in  
189 genome collections from the Shunet datasets, the phylum frequency was enriched in  
190 the *Desulfobacterota*, *Verrucomicrobiota*, *Bacteroidota*, and *Omnitrophota*. The

191 difference can also be seen by comparing Shunet datasets with a genomic catalog of  
192 Earth's microbiomes and 8,000 MAGs recovered by Tyson *et al.* [17, 18], which also  
193 had a higher proportion of *Proteobacteria*, but limited in the other four phyla enriched  
194 in Lake Shunet. The results suggest that, to gain a comprehensive picture of the  
195 microbial genomes on earth, there is a strong need for future studies to explore  
196 microbiomes from various habitats, especially overlooked or understudied habitats  
197 [17, 19].

198

199 **Novel predicted secondary-metabolite biosynthetic clusters and**  
200 **carbohydrate-active enzymes from newly recovered MAGs**

201 Here we demonstrate a) the value of recovering MAGs from rarely investigated  
202 habitats to mine novel microbial function potentials and b) the advantage of  
203 combining SRs and LRAs using two examples: secondary metabolite biosynthetic gene  
204 clusters (BGCs) and carbohydrate-active enzymes (CAZymes). Secondary  
205 metabolites are usually unique in one or a few species, and not related to the normal  
206 growth of the organisms [20]. The secondary metabolites, associated with ecological  
207 interactions, can serve as toxins, factors participating in symbiosis with other hosts,  
208 defense mechanisms [20, 21]. Identifying novel secondary metabolites enables us to  
209 understand the ecological interactions among the microbes. The majority of bacteria

210 remain uncultivated, so mining novel BGCs in metagenomes provides the opportunity  
211 to discover new secondary metabolites [22, 23].

212 In our MAG collection, we identified 414 putative BGCs from 140 MAGs (Fig.  
213 S1a). Among them, 134 BGCs were annotated as terpenes and 64 BGCs as  
214 bacteriocins. To determine the novelty of these BGCs, the BGCs were searched  
215 against the NCBI database using the cutoffs of 75% identity and 80% query coverage  
216 based on a previous study [17]. The results demonstrated that 384 BGCs (92%) could  
217 not be matched with these thresholds, indicating that most of these could be novel  
218 BGCs. Comparably, only 83% of BGCs were predicted to be novel BGCs in the  
219 recently-published Genomes from Earth's Microbiome catalog (GEM) [17].

220 Complete BGCs are important because they help us identify the metabolites that  
221 these BGCs produce using molecular approaches [21]. 72% of BGCs identified from  
222 MAGs in the 3.0 m dataset were not on the edge of the contigs, suggesting that the  
223 majority of BGCs may be complete. However, only 22% of BGCs in the 5.0 and 5.5  
224 m datasets were not on the edges, which could be because the MAGs from 3.0 m were  
225 more contiguous because they had a 10-fold larger median N50 (Fig. 1b). In total, 213  
226 BGCs (51%) we recovered were not on the edges. By comparison, only 34% BGCs  
227 predicted in the GEM MAG collection were not on the edge. In the 414 BGCs, 552  
228 core biosynthetic genes, 1,224 additional biosynthetic genes, 205 regulator genes, and

229 185 transporter genes were identified. This information will enable us to examine the  
230 products of the BGC, the function of these genes, and the roles of the products in the  
231 individual bacterium. On the other hand, the results also showed that the increased  
232 contiguity of MAGs by LRs enables us to obtain more complete BGCs.

233 Carbohydrate-active enzymes have a range of applications. For instance,  
234 CAZymes are used for food processing and food production [24-27]. Exploring novel  
235 CAZymes in the metagenome can benefit food industries [24, 25]. On the other hand,  
236 identifying novel CAZymes modules enables us to produce novel bioactive  
237 oligosaccharides that can be used to develop new drugs and supplements [26, 27].  
238 From the MAGs reconstructed in this study, we identified 8,750 putative CAZymes:  
239 3,918 glycosyltransferases, 3,304 glycoside hydrolases, 738 carbohydrate esterases,  
240 and 92 polysaccharide lyases (Fig. S1b). Previous studies indicated that 60~70%  
241 protein identity can be used as a threshold for the conservation of the enzymatic  
242 function [28-30]. Among the CAZymes we identified, 1,745 (44%)  
243 glycosyltransferases, 1,456 (44%) glycoside hydrolases, 267 (36%) carbohydrate  
244 esterases, and 57 (62%) polysaccharide lyases shared less than 60% protein identity  
245 with their closest homologs in the NCBI nr database (Fig. S1c). This indicates that  
246 these CAZymes could have novel carbohydrate-active functions, which future  
247 research efforts can explore further.

248

249 **Novel candidate archaeal families identified from Lake Shunet**

250 From the 5.5 m dataset, we identified two MAGs belonging to candidate novel  
251 families under *Methanomassiliicoccales* and *Iainarchaeales* (MAG ID: M55A1 and  
252 M55A2, respectively) and one MAG belonging to a potential novel species under  
253 *Nanoarchaeota*, according to the GTDB taxonomy assignment based on the  
254 phylogenomic tree and relative evolutionary divergence (RED) (Dataset S2). In the  
255 archaeal phylogenomic tree, M55A1 formed a clade basal to the clade containing  
256 species within the *Methanomethylophilaceae* family, a group of host-associated  
257 methanogens, and the branch was supported by a 94.7% UFBoot value (probability  
258 that a clade is true) [31]. The M55A1 and *Methanomethylophilaceae*-related clade  
259 formed a superclade that is adjacent to *Methanomassiliicoccaceae*-related clade, a  
260 group of environmental methanogens [32]. These clades formed the order  
261 *Methanomassiliicoccales*, the hallmark of which is the ability to produce methane.  
262 However, M55A1 did not contain genes encoding for a methane-producing key  
263 enzyme complex (Fig. S2). For example, genes encoding methyl-coenzyme M  
264 reductase alpha (*mcrA*), beta (*mcrB*), and gamma subunit (*mcrG*), a key enzyme  
265 complex involved in methane production, were absent in the M55A1. On the other  
266 hand, we did not find *Methanomassiliicoccaceae*-related *mcrA*, *mcrB*, or *mcrG* genes

267 in the other bins and unbinned sequences in the 5.5 m dataset. Furthermore, M55A1  
268 lacks most of the core methanogenesis marker genes identified in  
269 *Methanomassiliicoccales*.

270 The absence of these methanogenesis marker genes implies that the archaea may  
271 have lost their methane-producing ability. If this is true, then a phylogenetic group of  
272 *Methanomassiliicoccales* may have lost the ability to perform methanogenesis after its  
273 ancestor evolved the ability to produce methane. The results not only showed the  
274 potential functional diversity in this clade but also highlighted how much such a  
275 little-studied environment can reveal about functional diversity in known microbial  
276 lineages.

277

#### 278 **Five complete MAGs of a candidate novel genus and species from Lake Shunet**

279 The assemblies of Shunet datasets yielded six complete and circulated bacterial  
280 genomes. Among these six complete MAG, two belonged to a novel *Simkaniaceae*  
281 genus, and there were classified as novel *Cyanobium* species, *Thiocapsa* species, and  
282 species under GCA-2401735 (an uncharacterized genus defined previously based on  
283 phylogeny), according to the GTDB taxonomy inference based on ANI and  
284 phylogenomic analyses (Dataset S1 and S2). The following are individual  
285 descriptions of their unique taxonomic and metabolic features. The nitrogen, carbon,

286 sulfur, and energy metabolisms are described in Figure S3.

287 ***Candidate novel Simkaniaceae genus.*** According to GTDB-TK, there were two  
288 complete MAGs—M30B1 and M30B2—assigned as an unclassified genus under  
289 *Simkaniaceae*, a family in the class *Chlamydiia*, based on the topology of the  
290 phylogenetic tree. M30B1 and M30B2 formed a monophyletic group and shared  
291 72.48% percentage of conserved protein (PCOP), above the genus boundary of 50%  
292 PCOP [33]. The genomes shared 77% ANI, below the 95% cutoff for the same species  
293 [16], and the identity of their rRNA gene sequences was 98.45%. Together, the results  
294 showed that the two MAGs were two different new species under a novel genus.  
295 Therefore, we propose a new genus, *Candidatus Andegerimia*, to include the two  
296 MAGs, and renamed the two MAGs as *Candidatus Andegerimia shunetia* M30B1 and  
297 *Candidatus Andegerimia siberian* M30B2, abbreviated as M30B1 and M30B2,  
298 respectively.

299 *Simkaniaceae*, like all *Chlamydia*, are obligately intracellular bacteria that live in  
300 eukaryotic cells [34]. Validated natural hosts include various multicellular eukaryotic  
301 organisms like vertebrates. That some *Simkaniaceae* PCR clones were identified from  
302 drinking water implies that *Simkaniaceae* may also live in unicellular eukaryotes [35].  
303 Our samples were collected from saline water, and a membrane was used to filter  
304 large organisms. Hence, *Ca. A. shunetia* and *Ca. A. siberian* may be derived from tiny



305 or unicellular eukaryotic organisms.

306       The reconstruction of complete MAGs enables us to compare genomes in a  
307 precise and comprehensive manner by avoiding contamination caused by binning.  
308 The two *Simkaniaceae* MAGs we recovered contained five KEGG orthologues that  
309 were not present in known *Simkaniaceae* genomes (Table 1). First, the genomes have  
310 cold shock protein genes, and the genes were highly conserved (93% amino acid  
311 identity) between the two *Simkaniaceae* genomes. Cold shock proteins are used to  
312 deal with the sudden drop in temperature [36]. The proteins are thought to be able to  
313 bind with nucleic acids to prevent the disruption of mRNA transcription and protein  
314 translation caused by the formation of mRNA secondary structures due to low  
315 temperature [36]. The existence of the genes in the genomes may confer cold  
316 resistance on the *Simkaniaceae* bacteria in Lake Shunet, allowing them to withstand  
317 extremely cold environments.

318       Besides the cold shock protein genes, the two *Simkaniaceae* also had glutamate  
319 decarboxylase (GAD) genes. GAD is an enzyme that catalyzes the conversion of  
320 glutamate into  $\gamma$ -aminobutyric acid (GABA) and carbon dioxide. Many bacteria can  
321 utilize the GAD system to tolerate acidic stress by consuming protons during a  
322 chemical reaction [37]. The system usually accompanies glutamate/GABA antiporters,  
323 responsible for coupling the efflux of GABA and influx of glutamate. The antiporter

324 can also be found in the two novel *Simkaniaceae* genomes, indicating that the bacteria  
325 can use the system to tolerate acidic environments.

326 Along with the unique features in the genus, we identified a difference between  
327 the two MAGs in terms of metabolism. Taking sulfur metabolism as an example, the  
328 M30B2 had all the genes for assimilatory sulfate reduction (ASR), except for *cysH*,  
329 and contained the sulfate permease gene (Fig. S3). On the contrary, M30B1 did not  
330 contain ASR or the sulfate permease gene. This indicates that M30B2 can take up and  
331 use sulfate as a sulfur source, but M30B1 cannot. In summary, the recovery of these  
332 genomes broadens our knowledge of the metabolic versatility in *Simkaniaceae*.

333 ***Candidate novel Cyanobium species.*** The MAG M30B3 was classified as a  
334 novel *Cyanobacteria* species genome under the genus *Cyanobium*, based on  
335 phylogenomic tree and 84.28% ANI shared with the *Cyanobium\_A* sp007135755  
336 genome (GCA\_007135755.1), its closest phylogenetic neighbor. We named the  
337 genome *Candidatus Cyanobium* sp. M30B3, abbreviated as M30B3. The M30B3 is  
338 the predominant bacterium in Lake Shunet at 3.0 m and plays a pivotal role in  
339 providing organic carbon in the lake ecosystem [12].

340 Our analysis of the M30B3 genome revealed that the bacterium harbors an  
341 anti-phage system that its known relatives lack. In the novel cyanobacterial genome  
342 under the *Cyanobium* genus, we found that the genome harbored several

343 CRISPR-associated (Cas) protein genes that were not in other *Cyanobium* genomes  
344 (Table 1). The CRISPR-Cas system is a prokaryotic immune system that enables  
345 prokaryotic cells to defend against phages [38]. The system can be classified into six  
346 types and several subtypes according to protein content. The signature protein of type  
347 I is Cas3, which has endonuclease and helicase activities [38]. *cas3* genes can be  
348 found in the novel *Cyanobium* genome but not in other known *Cyanobium* genomes.  
349 Furthermore, the genome also had *cse1* and *cse2* proteins, signature proteins for the  
350 I-E subtype. Our results show that the novel genome harbors a type I-E CRISPR  
351 system and that this system is absent in its phylogenetic-close relatives.

352 ***Candidate novel Thiocapsa species M50B4.*** Lake Shunet features the extremely  
353 dense purple sulfur bacteria (PSB) in its chemocline (5.0 m) layer, and the density of  
354 these PSB is comparable to that of Lake Mahoney (Canada), renowned for containing  
355 the most purple sulfur bacteria of any lake in the world [39]. A complete MAG of  
356 *Thiocapsa* species, the predominant PSB in the 5.0 m layer, was recovered from the  
357 5.0 m dataset. The MAG was classified as a candidate novel species because it shared  
358 90.71% ANI with the genome of *Thiocapsa rosea*. Therefore, we propose the creation  
359 of a new species, *Candidatus Thiocapsa halobium*, abbreviated as M50B4.

360 The complete genome of the predominant PSB M50B4 will help us understand  
361 carbon, nitrogen, and sulfur cycling in Lake Shunet. *Thiocapsa* can perform

362 photosynthesis by reducing sulfur as an electron donor, and *Thiocapsa* can fix  
363 nitrogen [40, 41]. M50B4 contained genes for bacteriochlorophyll synthesis and the  
364 Calvin cycle for carbon fixation. A previous study revealed that *Thioflavicoccus*  
365 *mobilis*, a bacterium close to *Thiocapsa*, can utilize rTCA and the Calvin cycle to fix  
366 carbon [42]. In M50B4, all genes for the reverse TCA cycle (rTCA), except for the  
367 ATP citrate lyase gene, were identified. Whether the M50B4 can use both rTCA and  
368 the Calvin cycle like *T. mobilis* needs to be determined. For sulfur metabolism, the  
369 MAG carried intact gene sets involved in SOX system dissimilatory sulfate  
370 reduction/oxidation. The sulfate importer gene was also seen in the MAG, which  
371 equipped the bacterium with the ability to import extracellular thiosulfate and sulfate  
372 and to use them as sulfur sources. In terms of nitrogen metabolism, like other  
373 *Thiocapsa*, the bacterium had a gene cluster to conduct nitrogen fixation and a urea  
374 transporter and urease gene cluster to utilize urea. Besides nitrogen fixation, currently  
375 available *Thiocapsa* have all genes for denitrification, and some *Thiocapsa* have  
376 genes to convert nitrite to nitrate. However, the genes were not seen in our MAG.

377       There are currently five cultured *Thiocapsa* species. Two of these, *T. rosea* and *T.*  
378 *pendens*, contain gas vesicles. Our genomic analysis revealed gas vesicle structure  
379 protein genes in M50B4. These genes are also present in *T. rosea* and *T. pendens*, but  
380 not in any other *Thiocapsa* genomes, indicating that the genes are critical for vesicles

381 to exist in *Thiocapsa*, and therefore the novel species have gas vesicles. Gas vesicles  
382 enable *T. sp.* M50B4 cells to modulate their buoyancy so they can move to the  
383 locations with optimal light intensity or oxygen concentration [43]. Environmental  
384 conditions of Lake Shunet are known to be dynamic and change with seasons, and  
385 this function could be critical for M50B4.

386 We found that the novel *Thiocapsa* complete MAG have genes that encode  
387 dimethyl sulfoxide (DMSO) reductase subunits A and B (Table S2). DMSO reductase  
388 is an enzyme that catalyzes the reduction of DMSO into dimethyl sulfide (DMS). The  
389 reductase enables bacteria to use DMSO as terminal electron acceptors instead of  
390 oxygen during cellular respiration [44]. The DMSO reduction reaction could impact  
391 the environment. DMS, the product of the reaction, can be emitted into the  
392 atmosphere and be oxidized into sulfuric acid [45]. Sulfuric acid can act as a cloud  
393 condensation nucleus and leads to cloud formation, blocking radiation from the sun.  
394 The flux of the anti-greenhouse gas DMS is mainly investigated and discussed in  
395 oceanic environments [46, 47]. The flux and role of DMS in lake ecosystems are  
396 overlooked and rarely documented [48]. Our finding that the extremely dense PSB in  
397 Lake Shunet carried DMS metabolism shows the need to investigate the impact and  
398 importance of DMS from bacteria in lake ecosystems and sulfur cycling.

399 *Candidate novel Methylophilaceae species M30B5.* A complete MAG, named

400 M30B5, was classified as a novel *Methylophilaceae* species under a genus-level  
401 lineage, called GCA-2401735, which was defined based on phylogenetic placement  
402 [49]. The GCA-2401735 lineage currently only comprises two  
403 genomes—GCA-2401735 sp006844635 and GCA-2401735 sp002401735—neither of  
404 which meet high-quality genome standards due to their low completeness and lack of  
405 16S rRNA gene sequence. The novel complete genome can serve as a representative  
406 species of the genus and can be used to infer the capability of the genus (Table S2).  
407 Here, we propose the genus *Candidatus* Methylofavorus to include the three  
408 GCA-2401735 genomes, and the M30B5 was renamed as *Candidatus* Methylofavorus  
409 khakassia.

410 The isolation locations of the three genomes imply that their habitats were  
411 distinct from those of other *Methylophilaceae*. The three “Methylofavorus” genomes  
412 were isolated from a cold subseafloor aquifer, shallow marine methane seep, and  
413 saline lake, indicating that the bacteria can live in saline environments. By  
414 comparison, most other *Methylophilaceae* members live in soil and freshwater or are  
415 associated with plants (except for the OM43 lineage) [50]. This indicates that the  
416 ancestor of “Methylofavorus” gained the ability to live in saline habitats and diverged  
417 from the ancestor of the genus *Methylophilus*, its closest phylogenetic relatives.

418 The complete genome of M30B5 enables us to comprehensively study metabolic

419 potentials. *Methylophilaceae* is a family of *Proteobacteria* that can use methylamine  
420 or methanol as carbon or energy sources [51, 52]. In our analysis, methanol  
421 dehydrogenase gene existed in our genome, and methylamine dehydrogenase gene  
422 was absent, indicating that the bacteria use methanol as a carbon source instead of  
423 methylamine. For motility, flagella are found in some *Methylophilaceae*. Interestingly,  
424 flagella- and chemotaxis-related genes were not identified in the MAG but were  
425 identified in the other two “Methylofavors” species, suggesting that M30B5 lacks  
426 mobility comparing to the other two “Methylofavors” species (Fig. S4).

427       The comparative analysis of M30B5 and other “Methylofavors” species  
428 revealed that the bacteria use different types of machinery to obtain nitrogen (Fig. S4).  
429 The formamidase, urease, and urea transporters were present in M30B5 but not the  
430 other two “Methylofavors” species. Instead, the two “Methylofavors” species had  
431 nitrite reductase, which was not in our MAG. The results indicate that M30B5 can  
432 convert formamide into ammonia and formate, and take up extracellular urea as a  
433 nitrogen source. On the contrary, the other two “Methylofavors” can use nitrite as  
434 nitrogen resources. Our analysis revealed that “Methylofavors” is metabolically  
435 heterogeneous.

436

437 **Conclusions**

438           In this study, we successfully developed a workflow to recover MAGs by  
439 combining SRs and LR. This workflow reconstructed hundreds of high-quality and  
440 six complete MAGs—including six candidate novel bacterial orders, 20 families, 66  
441 genera, and 154 species—from water samples of Lake Shunet, a meromictic lake with  
442 a highly complex microbial community. It demonstrates that with extra less LR, we  
443 can salvage important genome information from previous SR metagenomes. Using  
444 comparative genomics, unique and intriguing metabolic features are identified in  
445 these complete MAGs, including two predominant novel species: *Thiocapsa* sp, and  
446 *Cyanobium* sp. [12]. The findings show that it is advantageous to apply this method in  
447 studies of microbial ecology and microbial genomics by revising and improving the  
448 shortcomings of SRs-based metagenomes. Additionally, we show that the MAGs  
449 contain a high proportion of potential novel BGCs and CAZymes, which can be  
450 valuable resources to validate and examine the metabolic flexibility of various  
451 microbial lineages through further experimental approaches and comparative  
452 genomics. Finally, this study found a high ratio of poorly detectable taxa in the public  
453 databases, suggesting that the investigation into rarely explored environments is  
454 necessary to populate the genomic encyclopedia of the microbial world, explore  
455 microbial metabolic diversity, and fill the missing gaps in microbial evolution.

456



## 457 **Materials and Methods**

### 458 **Sample collection**

459 Water samples at 3.0, 5.0, and 5.5 m deep were collected from Lake Shunet (54°  
460 25'N, 90° 13'E) on July 21, 2010. The collection procedure was described in our  
461 previous research [12]. Briefly, water was pumped from each depth into sterile  
462 containers. Part of the water was transferred into sterile 2.0-ml screw tubes (SSIbio®)  
463 and stored at -80°C until DNA extraction. The rest of the water was filtered through  
464 10-µm plankton and concentrated using tangential flow filtration (TFF) system  
465 (Millipore) with 0.22-µm polycarbonate membrane filters. The bacteria in the  
466 retentate were then retained on cellulose acetate membranes (0.2 µm pore size;  
467 ADVANTEC, Tokyo, Japan) and stored at -80°C until DNA extraction.

### 468 **DNA extraction and sequencing**

469 Reads from Illumina and Nanopore sequencing platforms were used in this study.  
470 The sequencing reads from Illumina were described in our previous study [12] (Table  
471 S1). DNA for Illumina sequencing was extracted from a TFF-concentrated sample  
472 using the cetyltrimethylammonium bromide (CTAB) method [53]. In terms of  
473 Nanopore sequencing for 3.0-m samples, the same DNA batch used for Illumina  
474 sequencing of 3.0-m was sent to Health GeneTech Corp. (Taiwan) for Nanopore  
475 sequencing. For 5.0- and 5.5-m samples, there was no DNA remaining after Illumina

476 sequencing, so in 2020 the DNA was extracted again from frozen water samples using  
477 the CTAB method by retaining the bacteria on cellulose acetate membranes without  
478 TFF concentration. The amounts of DNA were still insufficient for Nanopore  
479 sequencing, so the DNA samples were mixed with the DNA of a known bacterium,  
480 *Endozoicomonas* isolate, at a 1:2 ratio. No *Endozoicomonas* was detected in the water  
481 samples according to our 16S rRNA amplicon survey [12]. The mixed DNA was then  
482 sent to the NGS High Throughput Genomics Core at Biodiversity Research Center,  
483 Academia Sinica for Nanopore sequencing. To remove reads that had originated from  
484 the *Endozoicomonas* isolate, Kaiju web server [54] and Kraken 2 [55] were used to  
485 assign the taxonomy for each read; reads that were classified as *Endozoicomonas* by  
486 Kaiju or Kraken were removed from our sequencing results. The Nanopore  
487 sequencing and processing yielded 13.83, 12.57, and 4.79 Gbp of reads from the 3.0,  
488 5.0, and 5.5 m samples, respectively (Table S1).

#### 489 **Metagenome assembly**

490 MAG assembly was performed by combining short reads (SRs) from Illumina  
491 sequencing and long reads (LRs) from Nanopore sequencing; this workflow is  
492 described in Figure 1a. First, the LRs from 3.0, 5.0, and 5.5 m datasets were  
493 individually assembled by metaFlye v2.8 [11] with default settings, and the  
494 assemblies were polished with corresponding SRs using Pilon v1.23 [56]. On the

495 other hand, SRs were also assembled by MEGAHIT v1.2.9 with k-mer of 21, 31, 41,  
496 and 51 [57]. The assemblies from SRs and LRAs were then merged by quickmerge v0.3  
497 with parameters -ml 7500 -c 3 -hco 8 [58]. The merge assemblies were then binned  
498 using MaxBin2 [59], MetaBAT2 [60], and CONCOCT [61] in metaWRAP v1.3 [14].  
499 The bins from the three bin sets were then refined by the bin refinement module in  
500 metaWRAP v1.3. The resulting bins were then polished again by Pilon v1.23 five  
501 times. To reassemble the bin, sorted reads that belonged to individual bin were  
502 extracted by BWA-MEM v0.7.17 [62] for SRs and by minimap2 for LRAs [63]. The  
503 extracted long reads were assembled by Flye v2.8, or metaFlye v2.8 if the assembly  
504 failed using Flye v2.8 [11, 64]. The bins were then reassembled individually using  
505 Unicycler v0.4.8 using the extracted reads and reassembled long-read contigs which  
506 were used as bridges [65]. To determine whether the original or reassembled bin was  
507 better, the bin with higher value of genome completeness -  $2.5 \times$  contamination,  
508 estimated by checkM v1.1.3 [13], was chosen and retained. Contigs labeled as circular  
509 by Flye or metaFlye, >2.0 Mb in size, and completeness >95% were considered  
510 “complete” MAGs. The complete MAGs were visualized using CGView Server [66].

511 While we were preparing this manuscript, Damme *et al.* published a hybrid  
512 assembler, called MUFFIN, that also integrates metaFlye and metaWRAP to recover  
513 MAGs and Unicycler for reassembly [67]. However, our workflow has a step to

514 merge the assemblies from SRs and LRAs to increase the contiguity and assembly size.  
515 Moreover, for the reassembly, we use contigs from metaFlye, instead of default  
516 setting: miniasm, as the bridge, which we found can produce a better quality  
517 reassembly.

### 518 **Annotation of metagenome-assembly genomes**

519 The completeness, contamination, and other statistics on metagenome-assembled  
520 genomes (MAGs) were evaluated using CheckM v1.1.3 [13]. The genome statistics  
521 were processed in R [68] and visualized using the ggplot2 package [69]. The  
522 taxonomy of MAGs was inferred by GTDB-Tk v1.3.0 [70]. Average Nucleotide  
523 Identities (ANIs) between MAGs were determined by FastANI v1.32 [16]. MAGs  
524 were annotated using Prokka v1.14.5 with 'rfam' options [71]. To annotate MAGs  
525 with KEGG functional orthologs (K numbers), putative protein sequences predicted  
526 by Prodigal v2.6.3 [72] were annotated using EnrichM v0.6.0 [73]. The K number  
527 annotation results were then used to reconstruct the transporter systems and metabolic  
528 pathways using KEGG mapper [74], and the completeness of KEGG modules was  
529 evaluated using EnrichM. Secondary metabolite biosynthetic gene clusters in each  
530 MAG were identified using antiSMASH v5.0 [75]. Ribosomal RNA sequences were  
531 inferred by barrnap v0.9 [76].

### 532 **Phylogenetic analysis**

533 Bacterial and archaeal phylogenomic trees were inferred by a *de novo* workflow  
534 in GTDB-Tk v1.3.0 [70]. All species-level non-redundant MAGs recovered in this  
535 study were analyzed together with the reference genomes in Genome Taxonomy  
536 Database (GTDB) [49]. In the *de novo* workflow, marker genes in each genome were  
537 identified using HMMER 3.1b2 [77]. Multiple sequence alignments based on the  
538 bacterial or archaeal marker sets were then generated and masked with default settings.  
539 Trees of bacteria and archaea were then inferred from the masked multiple sequence  
540 alignment using FastTree with the WAG+GAMMA models and 1,000 bootstraps [78].  
541 The trees were visualized with the interactive Tree of Life (iTOL) v4 [79].

542

543

544

## 545 **Declarations**

546 *Ethics approval and consent to participate*

547 Not applicable

548

549 *Consent for publication*

550 Not applicable

551

552 ***Availability of data and materials***

553 All sequencing data and assembled genomes are available through National Center for  
554 Biotechnology Information (NCBI) repositories under BioProject ID: PRJNA721826.  
555 Sequence reads of metagenomes from samples at 3.0, 5.0, and 5.5 m deep can be  
556 found under SRA accession numbers SRR14300307, SRR14300308, SRR14300309,  
557 SRR14307495, SRR14307795, and SRR14307796. The accession numbers of MAGs  
558 can be found in dataset S1 and S2.

559

560 ***Conflict of Interest***

561 The authors declare that they have no conflict of interest.

562

563 ***Funding***

564 The study was supported by the Ministry of Science and Technology in Taiwan  
565 through the Taiwan–Russia Joint Project Grant NSC 102-2923-B-001-004-MY3 and  
566 MOST 105-2923-B-001-001-MY3.

567

568 ***Author's contributions***

569 Y.H.C. and S.L.T. conceived the idea for this study. Y.H.C. assembled the genomes,  
570 performed the bioinformatics analysis, and wrote the manuscript. P.W.C. and H.H.C.

571 prepared the DNA samples. D.R. and A.D. collected water samples. S.L.T. supervised  
572 the overall study. All authors read and approved the manuscript.

573

#### 574 *Acknowledgements*

575 This study was supported by funding from the Ministry of Science and Technology,  
576 Taiwan. Y.H.C. would like to acknowledge the Taiwan International Graduate  
577 Program (TIGP) for its fellowship towards his graduate studies. We would like to  
578 thank Noah Last of Third Draft Editing for his English language editing.

579

- 580 1. Chen LX, Anantharaman K, Shaiber A, Eren AM, Banfield JF: **Accurate and**  
581 **complete genomes from metagenomes**. *Genome Res* 2020, **30**(3):315-333.
- 582 2. Che Y, Xia Y, Liu L, Li AD, Yang Y, Zhang T: **Mobile antibiotic resistome in**  
583 **wastewater treatment plants revealed by Nanopore metagenomic**  
584 **sequencing**. *Microbiome* 2019, **7**(1):44.
- 585 3. Nayfach S, Shi ZJ, Seshadri R, Pollard KS, Kyrpides NC: **New insights from**  
586 **uncultivated genomes of the global human gut microbiome**. *Nature* 2019,  
587 **568**(7753):505-510.
- 588 4. Dong XY, Greening C, Rattray JE, Chakraborty A, Chuvochina M, Mayumi D,  
589 Dolfing J, Li C, Brooks JM, Bernard BB *et al*: **Metabolic potential of uncultured**  
590 **bacteria and archaea associated with petroleum seepage in deep-sea**  
591 **sediments**. *Nature Communications* 2019, **10**.
- 592 5. Mukherjee S, Stamatis D, Bertsch J, Ovchinnikova G, Sundaramurthi JC, Lee J,  
593 Kandimalla M, Chen IA, Kyrpides NC, Reddy TBK: **Genomes OnLine Database**  
594 **(GOLD) v.8: overview and updates**. *Nucleic Acids Res* 2021,  
595 **49**(D1):D723-D733.
- 596 6. Ayling M, Clark MD, Leggett RM: **New approaches for metagenome assembly**  
597 **with short reads**. *Brief Bioinform* 2020, **21**(2):584-594.
- 598 7. Moss EL, Maghini DG, Bhatt AS: **Complete, closed bacterial genomes from**  
599 **microbiomes using nanopore sequencing**. *Nature Biotechnology* 2020,

- 600           **38(6):701-+.**
- 601    8.    Liu L, Wang YL, Che Y, Chen YQ, Xia Y, Luo RB, Cheng SH, Zheng CM, Zhang T:  
602           **High-quality bacterial genomes of a partial-nitritation/anammox system by**  
603           **an iterative hybrid assembly method.** *Microbiome* 2020, **8(1).**
- 604    9.    Bertrand D, Shaw J, Kalathiyappan M, Ng AHQ, Kumar MS, Li C, Dvornicic M,  
605           Soldo JP, Koh JY, Tong C *et al*: **Hybrid metagenomic assembly enables**  
606           **high-resolution analysis of resistance determinants and mobile elements in**  
607           **human microbiomes.** *Nat Biotechnol* 2019, **37(8):937-944.**
- 608    10.   Latorre-Perez A, Villalba-Bermell P, Pascual J, Vilanova C: **Assembly methods**  
609           **for nanopore-based metagenomic sequencing: a comparative study.** *Sci Rep*  
610           2020, **10(1):13588.**
- 611    11.   Kolmogorov M, Bickhart DM, Behsaz B, Gurevich A, Rayko M, Shin SB, Kuhn K,  
612           Yuan J, Polevikov E, Smith TPL *et al*: **metaFlye: scalable long-read**  
613           **metagenome assembly using repeat graphs.** *Nat Methods* 2020,  
614           **17(11):1103-1110.**
- 615    12.   Wu YT, Yang CY, Chiang PW, Tseng CH, Chiu HH, Saeed I, Baatar B, Rogozin D,  
616           Halgamuge S, Degermendzhi A *et al*: **Comprehensive Insights Into**  
617           **Composition, Metabolic Potentials, and Interactions Among Archaeal,**  
618           **Bacterial, and Viral Assemblages in Meromictic Lake Shunet in Siberia.**  
619           *Frontiers in Microbiology* 2018, **9.**
- 620    13.   Parks DH, Imelfort M, Skennerton CT, Hugenholtz P, Tyson GW: **CheckM:**  
621           **assessing the quality of microbial genomes recovered from isolates, single**  
622           **cells, and metagenomes.** *Genome Res* 2015, **25(7):1043-1055.**
- 623    14.   Uritskiy GV, DiRuggiero J, Taylor J: **MetaWRAP-a flexible pipeline for**  
624           **genome-resolved metagenomic data analysis.** *Microbiome* 2018, **6(1):158.**
- 625    15.   Bowers RM, Kyrpides NC, Stepanauskas R, Harmon-Smith M, Doud D, Reddy  
626           TBK, Schulz F, Jarett J, Rivers AR, Eloë-Fadrosch EA *et al*: **Minimum information**  
627           **about a single amplified genome (MISAG) and a metagenome-assembled**  
628           **genome (MIMAG) of bacteria and archaea.** *Nat Biotechnol* 2017,  
629           **35(8):725-731.**
- 630    16.   Jain C, Rodriguez RL, Phillippy AM, Konstantinidis KT, Aluru S: **High**  
631           **throughput ANI analysis of 90K prokaryotic genomes reveals clear species**  
632           **boundaries.** *Nat Commun* 2018, **9(1):5114.**
- 633    17.   Nayfach S, Roux S, Seshadri R, Udway D, Varghese N, Schulz F, Wu D,  
634           Paez-Espino D, Chen IM, Huntemann M *et al*: **A genomic catalog of Earth's**  
635           **microbiomes.** *Nat Biotechnol* 2020.
- 636    18.   Parks DH, Rinke C, Chuvochina M, Chaumeil PA, Woodcroft BJ, Evans PN,  
637           Hugenholtz P, Tyson GW: **Recovery of nearly 8,000 metagenome-assembled**



- 638 **genomes substantially expands the tree of life.** *Nat Microbiol* 2017,  
639 **2(11):1533-1542.**
- 640 19. Obbels D, Verleyen E, Mano MJ, Namsaraev Z, Sweetlove M, Tytgat B,  
641 Fernandez-Carazo R, De Wever A, D'hondt S, Ertz D *et al*: **Bacterial and**  
642 **eukaryotic biodiversity patterns in terrestrial and aquatic habitats in the Sor**  
643 **Rondane Mountains, Dronning Maud Land, East Antarctica.** *Fems Microbiol*  
644 *Ecol* 2016, **92(6).**
- 645 20. Demain AL, Fang A: **The natural functions of secondary metabolites.** *Adv*  
646 *Biochem Eng Biotechnol* 2000, **69:1-39.**
- 647 21. Beedessee G, Hisata K, Roy MC, Van Dolah FM, Satoh N, Shoguchi E:  
648 **Diversified secondary metabolite biosynthesis gene repertoire revealed in**  
649 **symbiotic dinoflagellates.** *Sci Rep-Uk* 2019, **9.**
- 650 22. Medema MH, Fischbach MA: **Computational approaches to natural product**  
651 **discovery.** *Nat Chem Biol* 2015, **11(9):639-648.**
- 652 23. Chavali AK, Rhee SY: **Bioinformatics tools for the identification of gene**  
653 **clusters that biosynthesize specialized metabolites.** *Brief Bioinform* 2018,  
654 **19(5):1022-1034.**
- 655 24. Gong G, Zhou SS, Luo RB, Gesang Z, Suolang S: **Metagenomic insights into the**  
656 **diversity of carbohydrate-degrading enzymes in the yak fecal microbial**  
657 **community.** *Bmc Microbiol* 2020, **20(1).**
- 658 25. Sathya TA, Khan M: **Diversity of Glycosyl Hydrolase Enzymes from**  
659 **Metagenome and Their Application in Food Industry.** *J Food Sci* 2014,  
660 **79(11):R2149-R2156.**
- 661 26. Nakamura AM, Nascimento AS, Polikarpov I: **Structural diversity of**  
662 **carbohydrate esterases.** *Biotechnology Research and Innovation* 2017,  
663 **1(1):35-51.**
- 664 27. Alagawany M, Elnesr SS, Farag MR: **The role of exogenous enzymes in**  
665 **promoting growth and improving nutrient digestibility in poultry.** *Iran J Vet*  
666 *Res* 2018, **19(3):157-164.**
- 667 28. Espadaler J, Eswar N, Querol E, Aviles FX, Sali A, Marti-Renom MA, Oliva B:  
668 **Prediction of enzyme function by combining sequence similarity and protein**  
669 **interactions.** *Bmc Bioinformatics* 2008, **9.**
- 670 29. Addou S, Rentzsch R, Lee D, Orengo CA: **Domain-Based and Family-Specific**  
671 **Sequence Identity Thresholds Increase the Levels of Reliable Protein**  
672 **Function Transfer.** *Journal of Molecular Biology* 2009, **387(2):416-430.**
- 673 30. Radivojac P, Clark WT, Oron TR, Schnoes AM, Wittkop T, Sokolov A, Graim K,  
674 Funk C, Verspoor K, Ben-Hur A *et al*: **A large-scale evaluation of**  
675 **computational protein function prediction.** *Nature Methods* 2013,

- 676            **10(3):221-227.**
- 677    31.    Minh BQ, Nguyen MAT, von Haeseler A: **Ultrafast Approximation for**  
678            **Phylogenetic Bootstrap.** *Mol Biol Evol* 2013, **30(5):1188-1195.**
- 679    32.    Borrel G, Parisot N, Harris HMB, Peyretilade E, Gaci N, Tottey W, Bardot O,  
680            Raymann K, Gribaldo S, Peyret P *et al*: **Comparative genomics highlights the**  
681            **unique biology of Methanomassiliicoccales, a Thermoplasmatales-related**  
682            **seventh order of methanogenic archaea that encodes pyrrolysine.** *Bmc*  
683            *Genomics* 2014, **15.**
- 684    33.    Qin QL, Xie BB, Zhang XY, Chen XL, Zhou BC, Zhou J, Oren A, Zhang YZ: **A**  
685            **proposed genus boundary for the prokaryotes based on genomic insights.** *J*  
686            *Bacteriol* 2014, **196(12):2210-2215.**
- 687    34.    Everett KDE, Bush RM, Andersen AA: **Emended description of the order**  
688            **Chlamydiales, proposal of Parachlamydiaceae fam. nov. and Simkaniaceae**  
689            **fam. nov., each containing one monotypic genus, revised taxonomy of the**  
690            **family Chlamydiaceae, including a new genus and five new species, and**  
691            **standards for the identification of organisms.** *Int J Syst Bacteriol* 1999,  
692            **49:415-440.**
- 693    35.    Lienard J, Croxatto A, Gervaix A, Levi Y, Loret JF, Posfay-Barbe KM, Greub G:  
694            **Prevalence and diversity of Chlamydiales and other amoeba-resisting**  
695            **bacteria in domestic drinking water systems.** *New Microbes New Infect* 2017,  
696            **15:107-116.**
- 697    36.    Keto-Timonen R, Hietala N, Palonen E, Hakakorpi A, Lindstrom M, Korkeala H:  
698            **Cold Shock Proteins: A Minireview with Special Emphasis on Csp-family of**  
699            **Enteropathogenic Yersinia.** *Front Microbiol* 2016, **7:1151.**
- 700    37.    Feehily C, Karatzas KA: **Role of glutamate metabolism in bacterial responses**  
701            **towards acid and other stresses.** *J Appl Microbiol* 2013, **114(1):11-24.**
- 702    38.    Makarova KS, Haft DH, Barrangou R, Brouns SJJ, Charpentier E, Horvath P,  
703            Moineau S, Mojica FJM, Wolf YI, Yakunin AF *et al*: **Evolution and classification**  
704            **of the CRISPR-Cas systems.** *Nat Rev Microbiol* 2011, **9(6):467-477.**
- 705    39.    Overmann J, Beatty JT, Hall KJ, Pfennig N, Northcote TG: **Characterization of a**  
706            **Dense, Purple Sulfur Bacterial Layer in a Meromictic Salt Lake.** *Limnol*  
707            *Oceanogr* 1991, **36(5):846-859.**
- 708    40.    Caumette P, Guyoneaud R, Imhoff JF, Suling J, Gorlenko V: **Thiocapsa marina**  
709            **sp. nov., a novel, okenone-containing, purple sulfur bacterium isolated from**  
710            **brackish coastal and marine environments.** *Int J Syst Evol Microbiol* 2004,  
711            **54(Pt 4):1031-1036.**
- 712    41.    Schott J, Griffin BM, Schink B: **Anaerobic phototrophic nitrite oxidation by**  
713            **Thiocapsa sp. strain KS1 and Rhodopseudomonas sp. strain LQ17.**

- 714 *Microbiology (Reading)* 2010, **156**(Pt 8):2428-2437.
- 715 42. Rubin-Blum M, Dubilier N, Kleiner M: **Genetic Evidence for Two Carbon**  
716 **Fixation Pathways (the Calvin-Benson-Bassham Cycle and the Reverse**  
717 **Tricarboxylic Acid Cycle) in Symbiotic and Free-Living Bacteria.** *mSphere*  
718 2019, **4**(1).
- 719 43. Walsby AE: **Gas vesicles.** *Microbiol Rev* 1994, **58**(1):94-144.
- 720 44. Bilous PT, Weiner JH: **Dimethyl sulfoxide reductase activity by anaerobically**  
721 **grown Escherichia coli HB101.** *J Bacteriol* 1985, **162**(3):1151-1155.
- 722 45. Veres PR, Neuman JA, Bertram TH, Assaf E, Wolfe GM, Williamson CJ,  
723 Weinzierl B, Tilmes S, Thompson CR, Thames AB *et al*: **Global airborne**  
724 **sampling reveals a previously unobserved dimethyl sulfide oxidation**  
725 **mechanism in the marine atmosphere.** *P Natl Acad Sci USA* 2020,  
726 **117**(9):4505-4510.
- 727 46. Andreae MO, Raemdonck H: **Dimethyl Sulfide in the Surface Ocean and the**  
728 **Marine Atmosphere - a Global View.** *Science* 1983, **221**(4612):744-747.
- 729 47. Yoch DC: **Dimethylsulfoniopropionate: Its sources, role in the marine food**  
730 **web, and biological degradation to dimethylsulfide.** *Appl Environ Microb*  
731 2002, **68**(12):5804-5815.
- 732 48. Steinke M, Hodapp B, Subhan R, Bell TG, Martin-Creuzburg D: **Flux of the**  
733 **biogenic volatiles isoprene and dimethyl sulfide from an oligotrophic lake.**  
734 *Sci Rep-Uk* 2018, **8**.
- 735 49. Parks DH, Chuvochina M, Waite DW, Rinke C, Skarshewski A, Chaumeil PA,  
736 Hugenholtz P: **A standardized bacterial taxonomy based on genome**  
737 **phylogeny substantially revises the tree of life.** *Nat Biotechnol* 2018,  
738 **36**(10):996-1004.
- 739 50. Salcher MM, Schaeffle D, Kaspar M, Neuenschwander SM, Ghai R: **Evolution in**  
740 **action: habitat transition from sediment to the pelagial leads to genome**  
741 **streamlining in Methylophilaceae.** *Isme Journal* 2019, **13**(11):2764-2777.
- 742 51. Salcher MM, Schaeffle D, Kaspar M, Neuenschwander SM, Ghai R: **Evolution in**  
743 **action: habitat transition from sediment to the pelagial leads to genome**  
744 **streamlining in Methylophilaceae.** *ISME J* 2019, **13**(11):2764-2777.
- 745 52. Kalyuzhnaya MG, Bowerman S, Lara JC, Lidstrom ME, Chistoserdova L:  
746 **Methylotenera mobilis gen. nov., sp nov., an obligately**  
747 **methylamine-utilizing bacterium within the family Methylophilaceae.** *Int J*  
748 *Syst Evol Micr* 2006, **56**:2819-2823.
- 749 53. Wilson K: **Preparation of genomic DNA from bacteria.** *Curr Protoc Mol Biol*  
750 2001, **Chapter 2**:Unit 2 4.
- 751 54. Menzel P, Ng KL, Krogh A: **Fast and sensitive taxonomic classification for**

- 752            **metagenomics with Kaiju.** *Nat Commun* 2016, **7**:11257.
- 753    55.    Wood DE, Lu J, Langmead B: **Improved metagenomic analysis with Kraken 2.**
- 754            *Genome Biol* 2019, **20**(1):257.
- 755    56.    Walker BJ, Abeel T, Shea T, Priest M, Abouelliel A, Sakthikumar S, Cuomo CA,
- 756            Zeng Q, Wortman J, Young SK *et al*: **Pilon: an integrated tool for**
- 757            **comprehensive microbial variant detection and genome assembly**
- 758            **improvement.** *PLoS One* 2014, **9**(11):e112963.
- 759    57.    Li D, Liu CM, Luo R, Sadakane K, Lam TW: **MEGAHIT: an ultra-fast single-node**
- 760            **solution for large and complex metagenomics assembly via succinct de**
- 761            **Bruijn graph.** *Bioinformatics* 2015, **31**(10):1674-1676.
- 762    58.    Chakraborty M, Baldwin-Brown JG, Long AD, Emerson JJ: **Contiguous and**
- 763            **accurate de novo assembly of metazoan genomes with modest long read**
- 764            **coverage.** *Nucleic Acids Res* 2016, **44**(19):e147.
- 765    59.    Wu YW, Simmons BA, Singer SW: **MaxBin 2.0: an automated binning**
- 766            **algorithm to recover genomes from multiple metagenomic datasets.**
- 767            *Bioinformatics* 2016, **32**(4):605-607.
- 768    60.    Kang DD, Li F, Kirton E, Thomas A, Egan R, An H, Wang Z: **MetaBAT 2: an**
- 769            **adaptive binning algorithm for robust and efficient genome reconstruction**
- 770            **from metagenome assemblies.** *PeerJ* 2019, **7**:e7359.
- 771    61.    Alneberg J, Bjarnason BS, de Bruijn I, Schirmer M, Quick J, Ijaz UZ, Lahti L,
- 772            Loman NJ, Andersson AF, Quince C: **Binning metagenomic contigs by**
- 773            **coverage and composition.** *Nat Methods* 2014, **11**(11):1144-1146.
- 774    62.    Li H, Durbin R: **Fast and accurate short read alignment with**
- 775            **Burrows-Wheeler transform.** *Bioinformatics* 2009, **25**(14):1754-1760.
- 776    63.    Li H: **Minimap2: pairwise alignment for nucleotide sequences.**
- 777            *Bioinformatics* 2018, **34**(18):3094-3100.
- 778    64.    Kolmogorov M, Yuan J, Lin Y, Pevzner PA: **Assembly of long, error-prone reads**
- 779            **using repeat graphs.** *Nature Biotechnology* 2019, **37**(5):540-+.
- 780    65.    Wick RR, Judd LM, Gorrie CL, Holt KE: **Unicycler: Resolving bacterial genome**
- 781            **assemblies from short and long sequencing reads.** *PLoS Comput Biol* 2017,
- 782            **13**(6):e1005595.
- 783    66.    Grant JR, Stothard P: **The CGView Server: a comparative genomics tool for**
- 784            **circular genomes.** *Nucleic Acids Research* 2008, **36**:W181-W184.
- 785    67.    Van Damme R, Holzer M, Viehweger A, Muller B, Bongcam-Rudloff E, Brandt C:
- 786            **Metagenomics workflow for hybrid assembly, differential coverage binning,**
- 787            **metatranscriptomics and pathway analysis (MUFFIN).** *Plos Computational*
- 788            *Biology* 2021, **17**(2).
- 789    68.    Team RDC: **R: A Language and Environment for Statistical Computing.** In.: R

- 790 Foundation for Statistical Computing; 2020.
- 791 69. Villanueva RAM, Chen ZJ: **ggplot2: Elegant Graphics for Data Analysis, 2nd**  
792 **edition.** *Meas-Interdiscip Res* 2019, **17**(3):160-167.
- 793 70. Chaumeil PA, Mussig AJ, Hugenholtz P, Parks DH: **GTDB-Tk: a toolkit to**  
794 **classify genomes with the Genome Taxonomy Database.** *Bioinformatics*  
795 2019.
- 796 71. Seemann T: **Prokka: rapid prokaryotic genome annotation.** *Bioinformatics*  
797 2014, **30**(14):2068-2069.
- 798 72. Hyatt D, Chen GL, Locascio PF, Land ML, Larimer FW, Hauser LJ: **Prodigal:**  
799 **prokaryotic gene recognition and translation initiation site identification.**  
800 *BMC Bioinformatics* 2010, **11**:119.
- 801 73. Joel A Boyd, Ben J Woodcroft, Tyson. GW: **Comparative genomics using**  
802 **EnrichM.** *In preparation* 2019.
- 803 74. Kanehisa M, Sato Y: **KEGG Mapper for inferring cellular functions from**  
804 **protein sequences.** *Protein Sci* 2020, **29**(1):28-35.
- 805 75. Blin K, Shaw S, Steinke K, Villebro R, Ziemert N, Lee SY, Medema MH, Weber T:  
806 **antiSMASH 5.0: updates to the secondary metabolite genome mining**  
807 **pipeline.** *Nucleic Acids Res* 2019, **47**(W1):W81-W87.
- 808 76. Seemann T: **barrnap 0.9: rapid ribosomal RNA prediction.** *Google Scholar*  
809 2013.
- 810 77. Eddy SR: **Accelerated Profile HMM Searches.** *PLoS Comput Biol* 2011,  
811 **7**(10):e1002195.
- 812 78. Price MN, Dehal PS, Arkin AP: **FastTree 2--approximately**  
813 **maximum-likelihood trees for large alignments.** *PLoS One* 2010, **5**(3):e9490.
- 814 79. Letunic I, Bork P: **Interactive Tree Of Life (iTOL) v4: recent updates and new**  
815 **developments.** *Nucleic Acids Res* 2019, **47**(W1):W256-W259.

## 816 **Figure legends**

817 **Figure 1. Recovery of genomes from Lake Shunet using long- and short-read**  
818 **sequencing. a.** The workflow for assembling metagenome-assembled genomes  
819 (MAGs). **b.** The value of log (N50) at 3.0, 5.0, and 5.5 m deep using SRs only,  
820 combining SRs an LRs (Hybrid), and reassembly of bins using the hybrid method. **c.**  
821 The correlation between SR coverage and log (N50) in the final Shunet MAG

822 collection (Reassembly). **d.** The correlation between LR coverage and log (N50) in  
823 the final Shunet MAG collection (Reassembly). **e.** The completeness and  
824 contamination of recovered MAGs. **f.** Venn diagram from the ratio of MAGs,  
825 containing 5S, 16S, and 23S rRNA gene sequences. **g.** The GC ratio of MAGs  
826 recovered from the 3.0, 5.0, and 5.5 m deep datasets.

827

828 **Figure 2. Taxonomical and molecular phylogenetic analyses of recovered**  
829 **bacterial MAGs. a.** The numbers of novel taxonomic ranks of MAGs assigned by  
830 GTDB-Tk. **b.** The phylum frequencies in the MAG collection from the Shunet dataset  
831 and GTDB representative genomes. **c.** A phylogenetic tree based on the concatenation  
832 of 120 single-copy gene protein sequences. After masking, 5,040 amino acid sites  
833 were used in the analysis. The phylogenetic tree includes 188 recovered bacterial  
834 MAGs and 30,238 bacterial representative genomes in GTDB-r95. The blue points  
835 represent the placement of MAGs that are classified as novel species, the green points  
836 represent novel genera, the red points represent novel families, and the black points  
837 represent novel orders. Scale bar represents changes per amino acid site.

838

839 **Figure 3. Molecular phylogenetic analysis of recovered archaeal MAGs.** The  
840 phylogenetic tree was reconstructed based on the concatenation of 122 single-copy

841 gene protein sequences. After masking, 5,124 amino acid sites were used in the  
842 analysis. The phylogenetic tree including three MAGs from Lake Shunet and 1,672  
843 archaeal representative genomes in GTDB-r95. The blue dot represents the placement  
844 of MAG M55A2, the red dot represents MAG M55A1, and the green dot represents  
845 MAG M55A3. Scale bar represents changes per amino acid site.

846

847 **Figure 4. Representation of the six complete MAGs.**

848 The rings from the inside to outside represent GC content (black), GC skew- (purple),  
849 GC skew + (green), coding sequence regions (blue), rRNA gene sequences (black),  
850 transfer-messenger RNA (red), and secondary metabolite gene clusters (light blue).  
851 MAG ID M30B6 is classified as *Alcanivorax* sp002354605, M30B1 and M30B2 are  
852 *Simkaniaceae* sp., M30B3 is *Cyanobium* sp., M30B5 is “*Methylofavorus khakassia*”.,  
853 and M50B4 is “*Thiocapsa halobium*”.

854 **Table 1. KEGG orthologues that are present in the novel MAGs but absent in**

855 **their sister taxa**

856

|                     | <b>KO number</b> | <b>Definition</b>                                |
|---------------------|------------------|--------------------------------------------------|
| <i>Simkaniaceae</i> |                  |                                                  |
|                     | K00954           | <b>Pantetheine-phosphate adenylyltransferase</b> |
|                     | K01580           | <b>glutamate decarboxylase</b>                   |
|                     | K15736           | <b>L-2-hydroxyglutarate</b>                      |
|                     | K01607           | <b>carboxymuconolactone decarboxylase</b>        |
|                     | K03704           | <b>cold shock protein</b>                        |
| <i>Thiocapsa</i>    |                  |                                                  |
|                     | K07306           | <b>anaerobic DMSO reductase subunit A</b>        |
|                     | K07307           | <b>anaerobic DMSO reductase subunit B</b>        |
|                     | K01575           | <b>acetolactate decarboxylase</b>                |
|                     | K13730           | <b>internalin A</b>                              |
|                     | K05793           | <b>tellurite resistance protein TerB</b>         |
|                     | K05794           | <b>tellurite resistance protein TerC</b>         |
|                     | K05791           | <b>tellurium resistance protein TerZ</b>         |
| <i>Cyanobium</i>    |                  |                                                  |
|                     | K07012           | <b>CRISPR-associated endonuclease/helicase</b>   |
|                     | K07475           | <b>Cas3</b>                                      |
|                     | K15342           | <b>CRISP-associated protein Cas1</b>             |
|                     | K19046           | <b>CRISPR system Cascade subunit CasB</b>        |
|                     | K19123           | <b>CRISPR system Cascade subunit CasA</b>        |
|                     | K19124           | <b>CRISPR system Cascade subunit CasC</b>        |
|                     | K19125           | <b>CRISPR system Cascade subunit CasD</b>        |
|                     | K19126           | <b>CRISPR system Cascade subunit CasE</b>        |

857



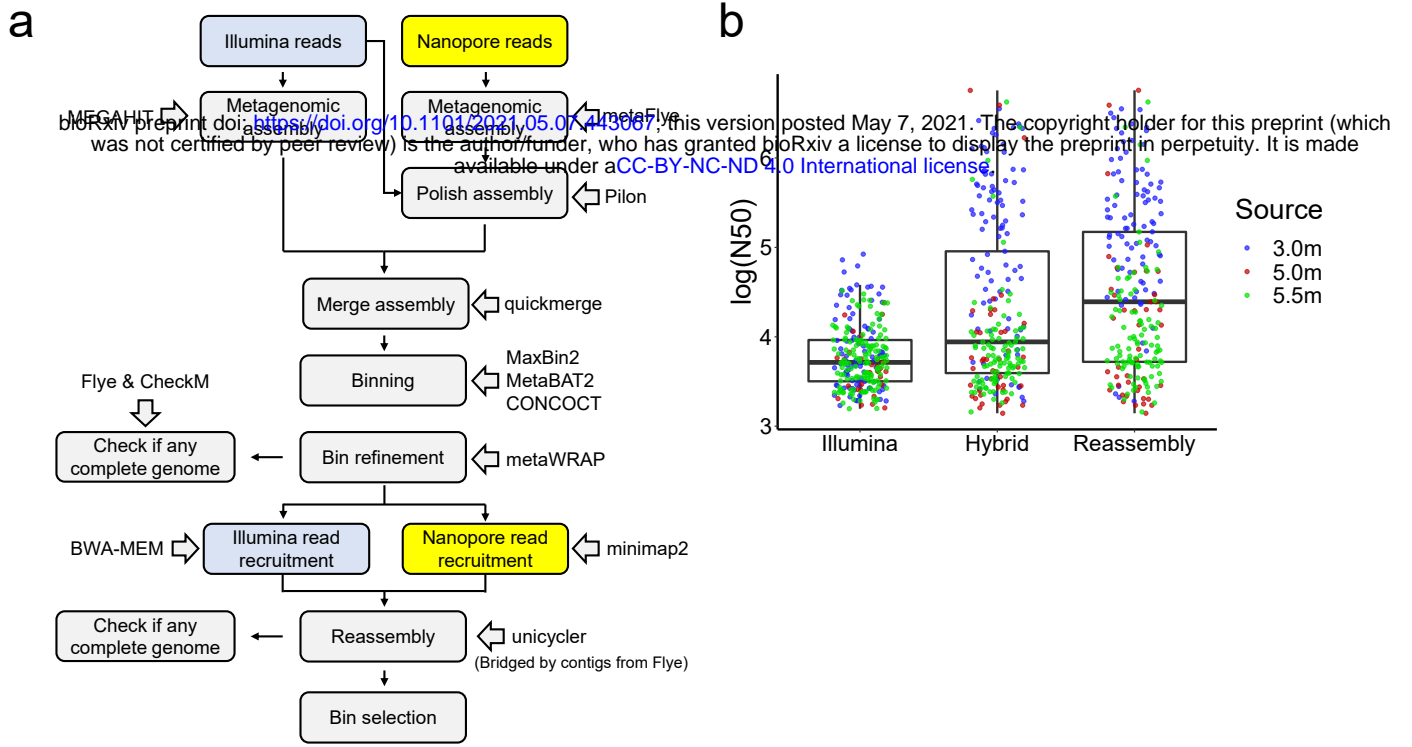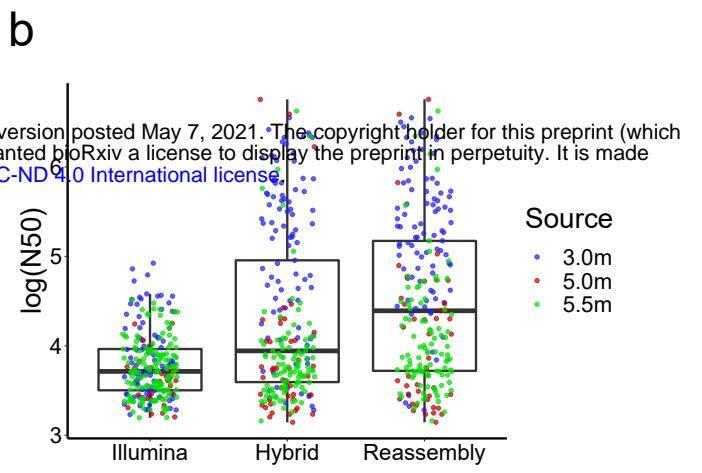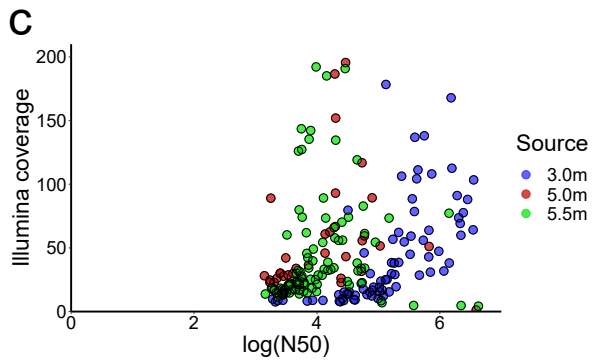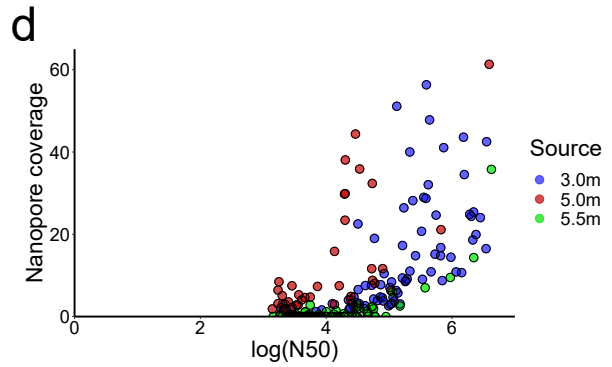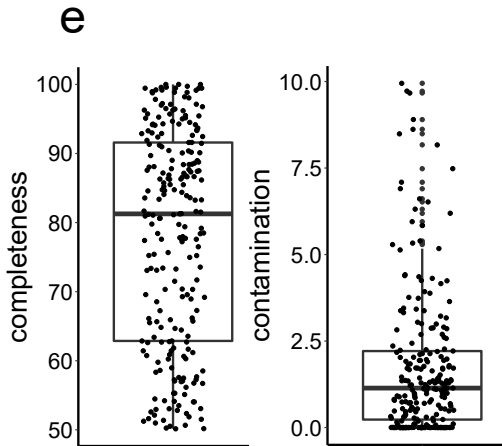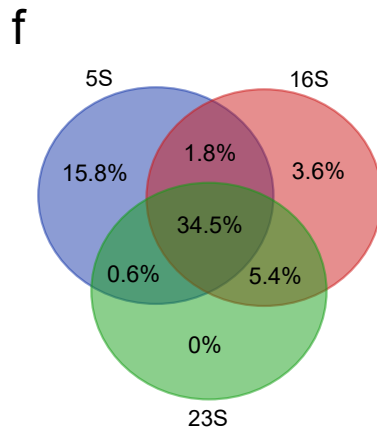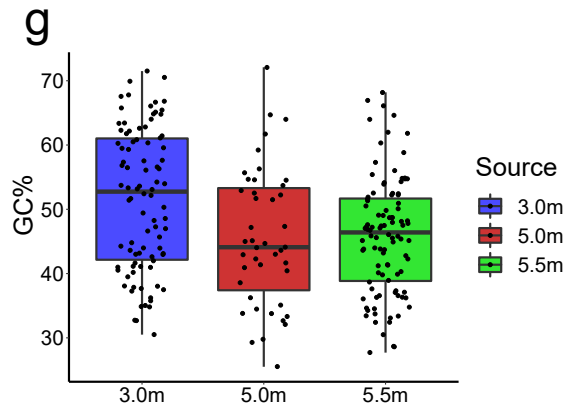

**a**

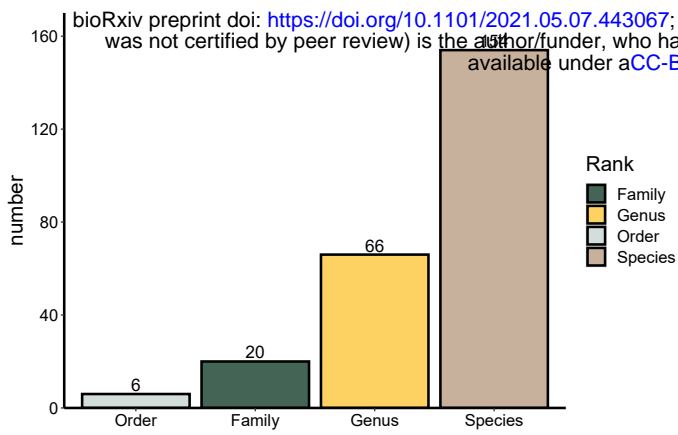

**b**

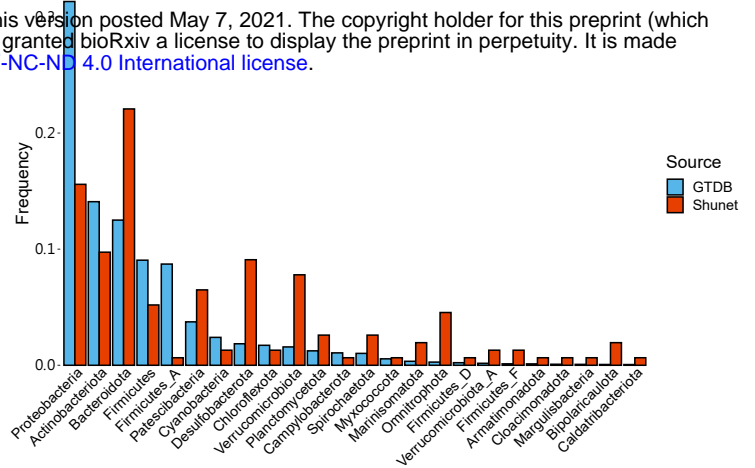

**c**

Tree scale: 1

- 1. *Firmicutes*
- 2. *Firmicutes\_D*
- 3. *Firmicutes\_A*
- 4. *Firmicutes\_F*
- 5. *Armatimonadota*
- 6. *Actinobacteriota*
- 7. *Patescibacteria*
- 8. *Chloroflexota*
- 9. *Cyanobacteria*
- 10. *Margulisbacteria*
- 11. *Bipolaricaulota*
- 12. *Spirochaetota*
- 13. *Caldatribacteriota*
- 14. *Bacteroidota*
- 15. *Marinisomatota*
- 16. *Cloacimonadota*
- 17. *Verrucomicrobiota*
- 18. *Verrucomicrobiota\_A*
- 19. *Planctomycetota*
- 20. *Omnitrophota*
- 21. *Campylobacterota*
- 22. *Desulfobacterota*
- 23. *Myxococcota*
- 24. *Proteobacteria*

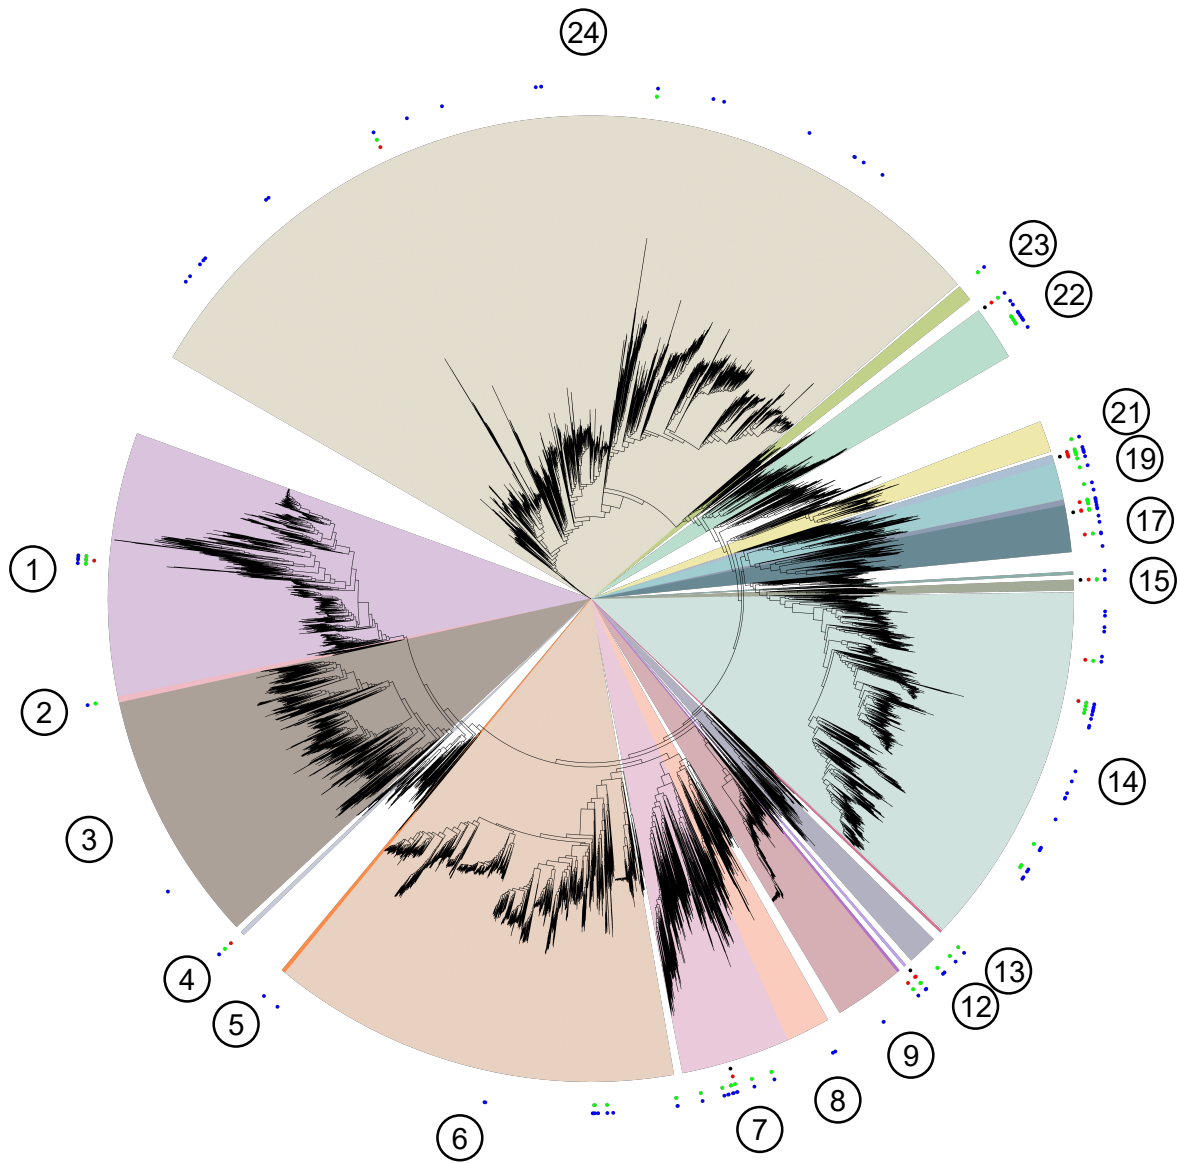

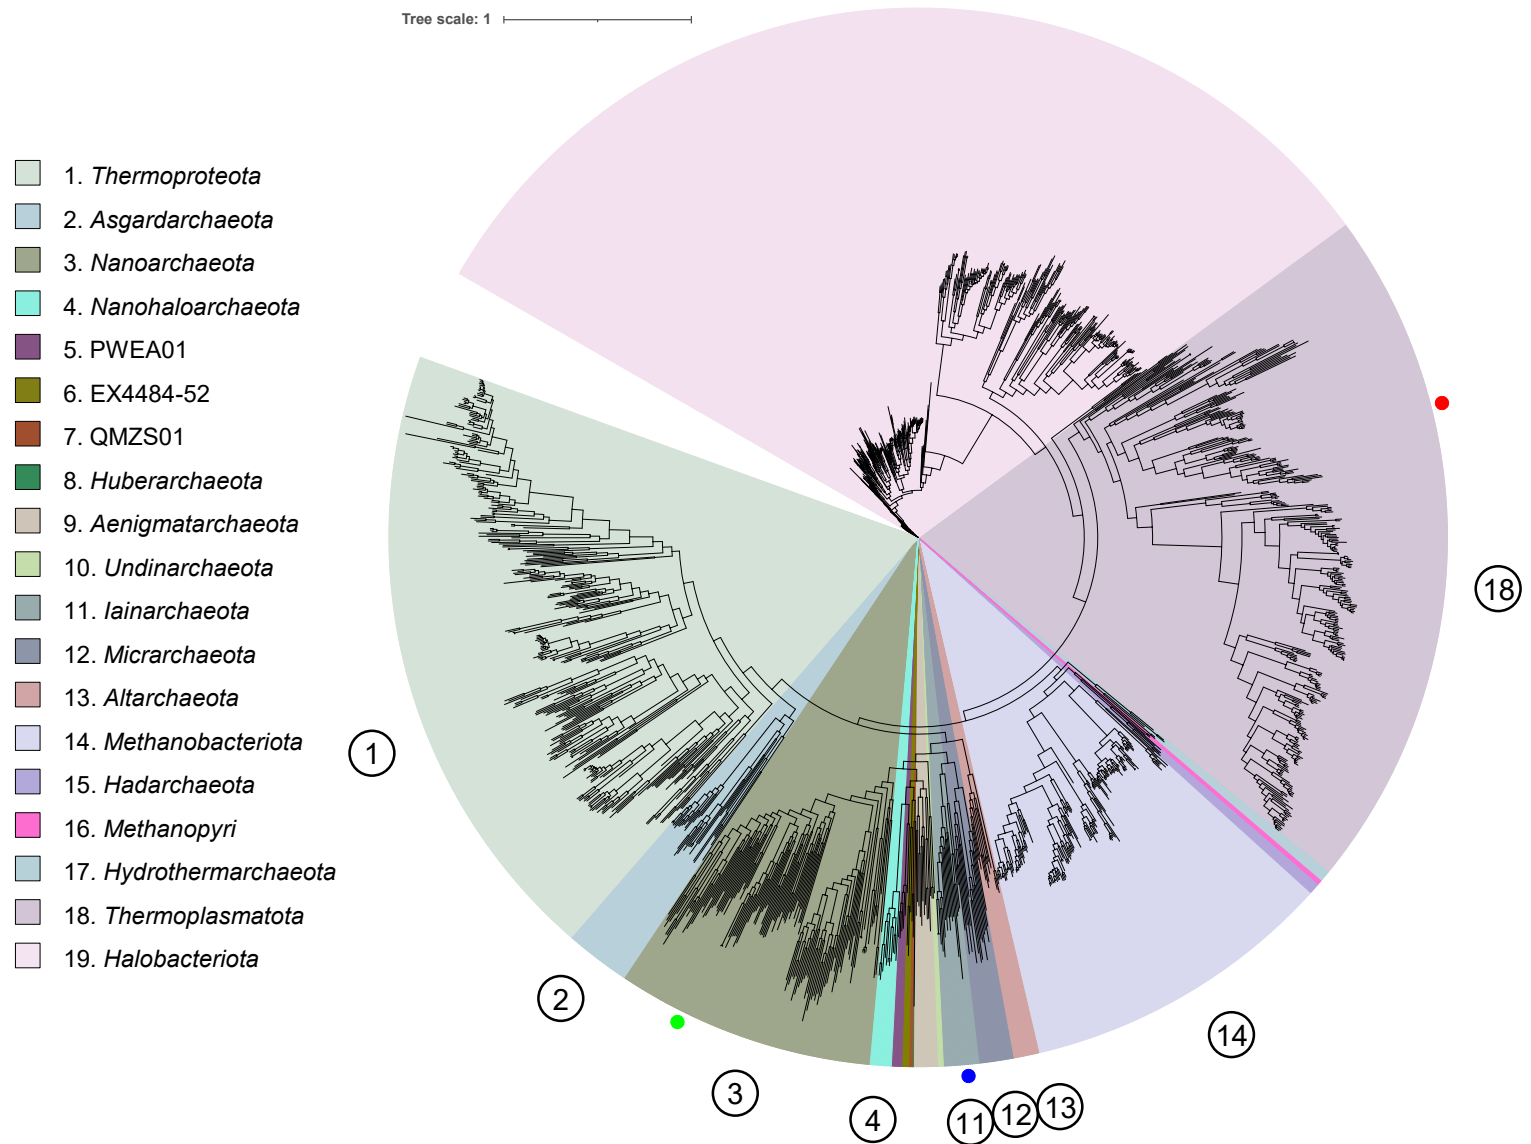

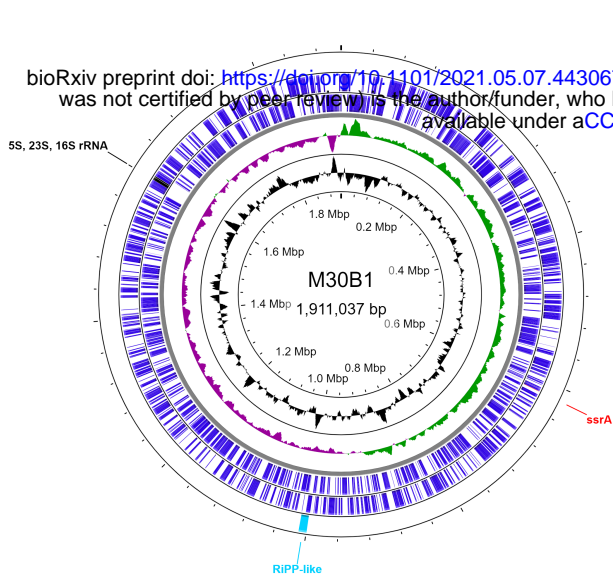

*Ca. Andegerimia shunetia*

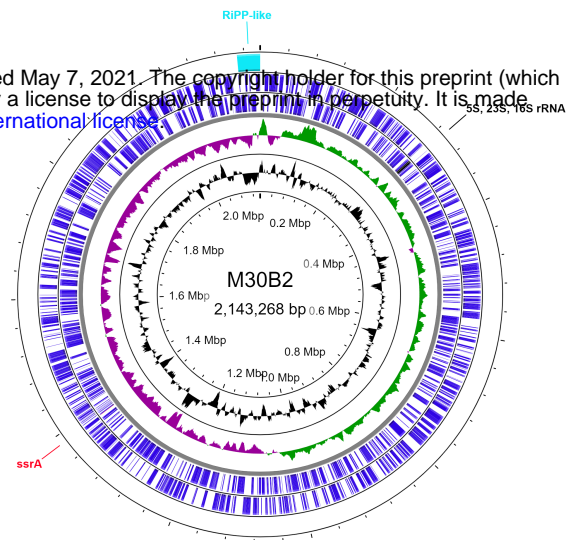

*Ca. Andegerimia siberian*

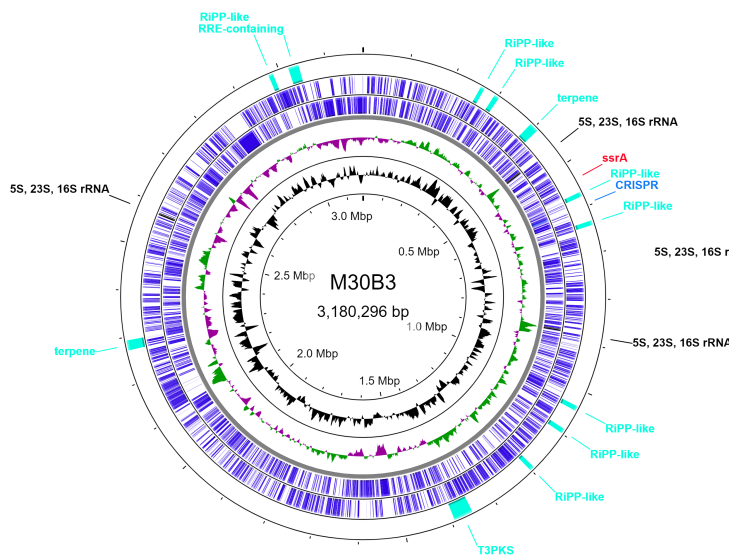

*Cyanobium* sp.

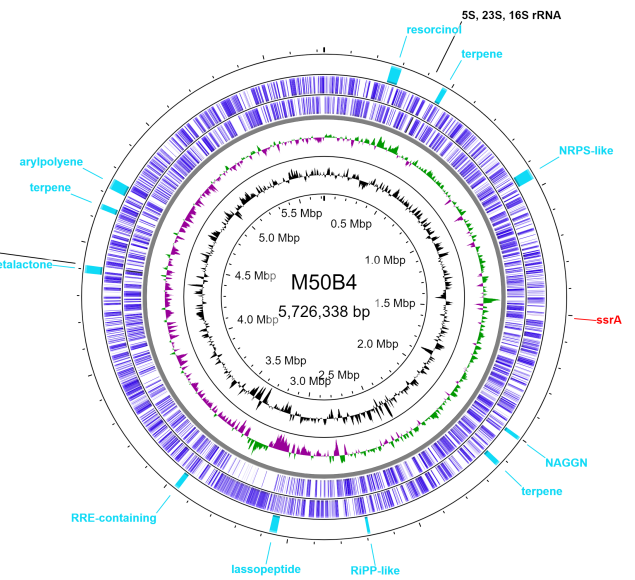

*Ca. Thiocapsa halobium*

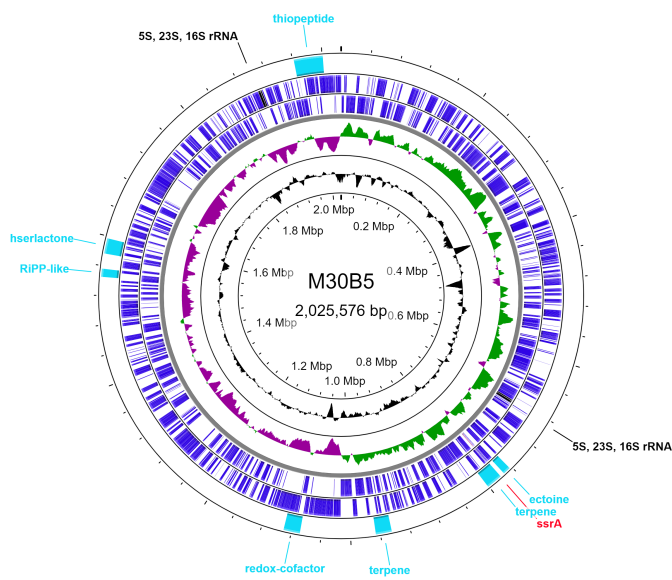

*Ca. Methylofavorus khakassia*

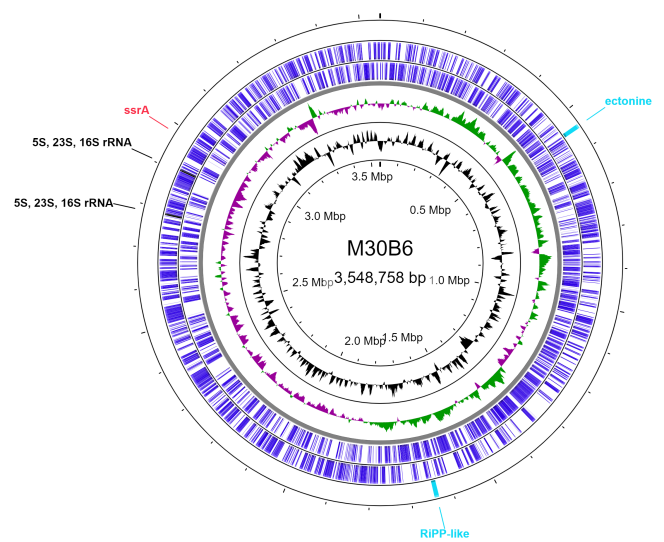

*Alcanivorax* sp002354605
